# Supplementary material for: Monitoring of gas and fluid transport from the hydrothermal reservoir to the Cerro Pabellón geothermal plant; international validation of analytical protocols
Source: Research Square preprint supplement (doi:10.21203/rs.3.rs-6606023/v1), 2025-10-15
Supplement: Supplementary file 1 [file 6fd46a0b6ca786a124e671a3.xlsx]

## Sheet: Table2
Sampling point	Segment	Fluid type	Date	pH	Temperature	Conductivity	Alcalinity	[HCO32-]	[Na]	[Ca]	[Cl]	[SO4]	[Li]	[Al]	[Fe]	[Cs]	[As]	[Sb]	Total dissolved solids
					(°C)	µS/cm	(%)	ppm	ppm	ppm	ppm	ppm	ppm	ppm	ppm	ppm	ppm	ppm	ppm
				pH	T	cond	alc	HCO3	Na	Ca	cl	SO4	Li	Al	Fe	Cs	As	Sb	TDS
CP-1A	Production well	Bifase fluid	2017-07-05	5.762	18.9	75.3	0.69	42.0969	0.47	0.41	2	0.55	0.013	0.0066	6.33	0.0097	0.22	0.033	82.3721
CP-5A	Production well	Bifase fluid	2016-06-26	7.381	16.2	171.4	14.26	870.003	4.9		37.48	2.2	0.05	0.0083	3.07	0.03	0.14	0.03	922.452
CP-5A	Production well	Bifase fluid	2016-06-27	7.365	16.2	921	10.48	639.385	366.9	44.1	330.41	2.74	4.06	0.002	0.97	2.29	3.18	0.07	1449.45
CP-5A	Production well	Bifase fluid	2017-09-27	5.1	21.6	34.39	0.39	23.7939	0.34	0.29	0.14	0.61	0.013	0.01	1.5	0.008	0.037	0.006	67.8168
CP-5A	Production well	Bifase fluid	2017-09-27	5.1	21.6	44.62	0.31	18.9131	0.33	0.29	1.63	4.44	0.013	0.019	1.63	0.0081	0.038	0.0054	69.9705
CP-5A	Production well	Bifase fluid	2017-09-27	5.1	21.4	42.83	0.33	20.1333	0.42	0.28	1.62	4.54	0.013	0.0075	1.46	0.0082	0.036	0.0051	76.4081
L. F/CP-5+5A	Separation Line	Vapor	2017-10-18	5.515	19.5	42.13	0.34	20.7434	2.84	0.1	3.59	0.97	0.022	0.0014	0.35	0.012	0.044	0.014	72.7043
L. F/CP-5+5A	Separation Line	Vapor	2017-11-23	5.04	24.7	47.05	0.52	31.7252	2.83	0.15	0.076	0.64	0.00066	0.01	4.77	0.00044	0.028	0.0073	81.2793
CP-6	Production well	Bifase fluid	2017-12-04	5.71	24.9	72.76	0.74	45.1474	3.53	0.83	2.1	1.16	0.021	0.011	6.72	0.012	1.07	0.031	184.567
L. J/CP-1+1A	Separation Line	Vapor	2018-01-11	4.695	25.4	65.38	0.43	26.2343	3.04	1.51	6.28	1.91	0.028	0.0067	1.63	0.0106	0.15	0.0096	83.7942
Línea J/CP-6	Separation Line	Vapor	2018-10-03	4.7	21.4	31.09	0.34	20.7434	0.35	0.31	0.72	1.45	0.0064	0.0087	2.26	0.0032	0.12	0.013	55.3636
L. J. filtrada/ CP-6	Separation Line	Vapor	2019-08-01	4.8	19.4	30.84	0.26	15.8626	6.4	0.88	0.42	1.31	0.076	0.008	1.73	0.039	0.17	0.027	53.7406
L.F./CP-5	Separation Line	Vapor	2019-08-06	4.8	19.6	32.38	0.36	21.9636	15.9	1.87	0.53	0.98	0.19	0.008	0.47	0.089	0.31	0.014	82.9936
Línea F	Separation Line	Vapor	2020-03-04	4.71	24.4	38.05	0.34	20.7434	0.19	0.48	0.84	3.83	0.0018	0.0051	0.25	0.0022	0.046	0.0069	132.989
Línea J	Separation Line	Vapor	2020-03-05	4.597	24.3	32.55	0.29	17.6929		0.1	0.46	3.57	0.018	0.0059	1.23	0.001	0.017	0.0025	272.399
