# Supplementary material for: Monitoring of gas and fluid transport from the hydrothermal reservoir to the Cerro Pabellón geothermal plant; international validation of analytical protocols
Source: Research Square preprint supplement (doi:10.21203/rs.3.rs-6606023/v1), 2025-10-15
Supplement: Supplementary file 2 [file 71df01d222afc618244f9601.xlsx]

## Sheet: Table4
Variable (Original name)	Variable units	Variables*	Li	Na	Al	Cl	Ca	Fe	As	Sb	Cs	SO4	pH	T	cond	alc	HCO3	TDS
[Li]	ppm	Li	1
[Na]	ppm	Na	0.9999	1
[Al]	ppm	Al	-0.415	-0.4163	1
[Cl]	ppm	Cl	0.9988	0.9989	-0.4177	1
[Ca]	ppm	Ca	0.9996	0.9996	-0.4149	0.9991	1
[Fe]	ppm	Fe	-0.2042	-0.1993	0.2757	-0.1933	-0.1978	1
[As]	ppm	As	0.9491	0.9502	-0.353	0.9477	0.9516	0.008414	1
[Sb]	ppm	Sb	0.8678	0.8686	-0.4261	0.8682	0.8694	0.2002	0.9365	1
[Cs]	ppm	Cs	1	0.9999	-0.4145	0.9991	0.9996	-0.2014	0.949	0.8683	1
[SO4]	ppm	SO4	0.1472	0.1436	0.2143	0.1574	0.1501	-0.4295	0.06268	-0.1112	0.1491	1
pH	pH	pH	0.8605	0.8617	-0.3748	0.8666	0.858	0.153	0.8963	0.9328	0.8625	-0.02054	1
Temperature	(°C)	T	-0.6179	-0.6124	0.3732	-0.6029	-0.6011	0.2565	-0.5079	-0.6037	-0.6169	0.03235	-0.6471	1
Conductivity	µS/cm	cond	0.9966	0.9969	-0.4116	0.9986	0.9976	-0.1469	0.9564	0.8872	0.997	0.1446	0.8832	-0.5931	1
Alcalinity	(%)	alc	0.9975	0.9979	-0.4113	0.9987	0.9979	-0.1464	0.9576	0.8869	0.9979	0.1319	0.8821	-0.5976	0.9995	1
[HCO32-]	ppm	HCO3	0.9975	0.9979	-0.4113	0.9987	0.9979	-0.1464	0.9576	0.8869	0.9979	0.1319	0.8821	-0.5976	0.9995	1	1
Total dissolved solids	ppm	TDS	0.9949	0.9954	-0.4116	0.9959	0.9958	-0.1538	0.9667	0.885	0.9953	0.1583	0.8772	-0.5658	0.9968	0.9974	0.9974	1
*Abbreviation applied for PCA and UMAP figures
