# Supplementary material for: Monitoring of gas and fluid transport from the hydrothermal reservoir to the Cerro Pabellón geothermal plant; international validation of analytical protocols
Source: Research Square preprint supplement (doi:10.21203/rs.3.rs-6606023/v1), 2025-10-15
Supplement: Supplementary file 3 [file 7e6022f1cae09e06f102011f.xlsx]

## Sheet: Table6
Variable (Original name)	Variables*	PC1	PC2	PC3	PC4	PC5
Separation P (Bar)	Psep_R	0.1371	-0.032	-0.101	-0.6907	-0.0595
Brine Flux (t/h/	Qsal_R	-0.1526	-0.6621	-0.0662	-0.3446	0.1465
Vapor flux (t/h)	Qvap_R	0.1648	-0.1051	-0.0073	-0.0934	0.5275
Vapor fraction (%)	Vap Fraction_R	-0.4174	0.5954	0.3677	-0.1363	-0.2005
Gas/Vapor fraction (%)	GV_R	0.0181	0.3993	0.0359	-0.299	-0.5954
[CO2] (pct)	CO2_pct_R	0.7629	0.4306	-0.0172	0.0896	-0.2332
[H2S] (pct)	H2S_pct_R	-0.5392	-0.2346	-0.4864	0.0403	-0.1259
[Ar] (pct)	Ar_pct_R	-0.8903	0.1446	-0.0198	0.0832	0.1641
[O2] (pct)	O2_pct_R	-0.8206	0.2954	-0.1163	0.009	-0.138
[N2] (pct)	N2_pct_R	-0.6914	-0.3753	0.2428	-0.1409	0.345
[H2] (pct)	H2_pct_R	-0.0412	0.0553	0.7257	0.0033	0.3328
[He] (ppm)	He_ppm_R	-0.3908	-0.6504	0.0861	-0.2773	0.1136
[CH4] (ppm)	CH4_ppm_R	-0.1856	-0.7602	0.1331	-0.3619	-0.3356
[CO] (ppm)	CO_ppm_R	-0.2192	-0.5478	0.4921	0.5411	-0.272
CH4/CO2	CH4/CO2_R	-0.2415	-0.7571	0.1501	-0.3516	-0.3133
CO/CO2	CO/CO2_R	-0.2268	-0.552	0.4877	0.5431	-0.2616
CO2/H2S	CO2/H2S_R	0.5529	0.2461	0.4707	-0.0422	0.1128
N2/O2	N2/O2_R	0.7442	-0.4053	0.0703	-0.0643	0.2126
N2/Ar	N2/Ar_R	0.818	-0.3382	0.1126	-0.1662	-0.1139
CO2/Ar	CO2/Ar_R	0.9171	-0.1154	0.0494	-0.0779	-0.1523
H2/Ar	H2/Ar_R	0.7594	-0.0786	0.3899	-0.0642	0.0673
[RH] (redox)	RH_R	-0.4426	0.3753	0.7057	-0.2138	-0.0656
Equilibrium °T (°C)	TK6_R	0.354	-0.6454	-0.3598	0.4455	-0.0418
Proportion explained variables%		29.02	19.79	11.03	8.506	6.586
*Abbreviation used for PCA and UMAP figures
