# Supplementary material for: Monitoring of gas and fluid transport from the hydrothermal reservoir to the Cerro Pabellón geothermal plant; international validation of analytical protocols
Source: Research Square preprint supplement (doi:10.21203/rs.3.rs-6606023/v1), 2025-10-15
Supplement: Supplementary file 4 [file 7fb4551e845d6434e0b9891b.xlsx]

## Sheet: Table3
Variables	Variable (Figure abrev.*)	Psep_R	Qsal_R	Qvap_R	Vap Fraction_R	GV_R	CO2_pct_R	H2S_pct_R	Ar_pct_R	O2_pct_R	N2_pct_R	H2_pct_R	He_ppm_R	CH4_ppm_R	CO_ppm_R	CH4/CO2_R	CO/CO2_R	CO2/H2S_R	N2/O2_R	N2/Ar_R	CO2/Ar_R	H2/Ar_R	RH_R	TK6_R
Separation P (Bar)	Psep_R	1
Brine Flux (t/h/	Qsal_R	0.1186	1
Vapor flux (t/h)	Qvap_R	-0.1459	0.2462	1
Vapor fraction (%)	Vap Fraction_R	-0.09299	-0.3924	-0.1297	1
Gas/Vapor fraction (%)	GV_R	0.1378	-0.2035	-0.1687	0.2202	1
[CO2] (pct)	CO2_pct_R	0.04441	-0.3633	-0.02166	-0.02624	0.2413	1
[H2S] (pct)	H2S_pct_R	-0.04757	0.1901	-0.03384	-0.01227	-0.1285	-0.5321	1
[Ar] (pct)	Ar_pct_R	-0.1232	0.01658	-0.1618	0.3506	-0.03672	-0.5727	0.2614	1
[O2] (pct)	O2_pct_R	-0.1103	0.01053	-0.1207	0.4138	0.2234	-0.4815	0.4488	0.6956	1
[N2] (pct)	N2_pct_R	-0.01296	0.3299	-4.579e-05	0.07541	-0.2243	-0.8821	0.1714	0.6372	0.3501	1
[H2] (pct)	H2_pct_R	-0.006593	-0.03887	0.1183	0.04716	-0.03191	-0.1348	-0.2062	0.04057	0.001923	0.2399	1
[He] (ppm)	He_ppm_R	0.1671	0.5371	-0.09954	-0.1155	-0.3259	-0.5917	0.3266	0.2376	0.04318	0.5975	0.01799	1
[CH4] (ppm)	CH4_ppm_R	0.1559	0.5765	0.01383	-0.1913	0.0002747	-0.3797	0.1656	0.01658	-0.05201	0.3664	-0.08233	0.5311	1
[CO] (ppm)	CO_ppm_R	-0.3281	0.1596	-0.1409	-0.06447	-0.2184	-0.291	0.07821	0.1025	0.01181	0.2877	0.2299	0.3109	0.3811	1
CH4/CO2	CH4/CO2_R	0.1279	0.5775	0.01708	-0.1649	-0.009615	-0.4342	0.1869	0.06488	-0.01071	0.4194	-0.06058	0.5531	0.9959	0.3978	1
CO/CO2	CO/CO2_R	-0.3249	0.162	-0.143	-0.07088	-0.2271	-0.3013	0.08265	0.1129	0.01474	0.2989	0.2337	0.3148	0.3808	0.9994	0.398	1
CO2/H2S	CO2/H2S_R	0.05128	-0.1951	0.02917	0.0131	0.1315	0.5575	-0.9984	-0.2726	-0.4528	-0.2024	0.1884	-0.3386	-0.172	-0.0919	-0.1948	-0.09698	1
N2/O2	N2/O2_R	0.111	0.08237	0.1432	-0.4648	-0.2904	0.342	-0.3969	-0.6276	-0.9473	-0.1994	-0.04592	0.08773	0.1409	-0.01873	0.1038	-0.01928	0.3962	1
N2/Ar	N2/Ar_R	0.169	0.0804	0.1798	-0.3843	-0.02033	0.3852	-0.3387	-0.8945	-0.7241	-0.3889	-0.06474	-0.0315	0.1757	0.006364	0.1326	-0.002015	0.345	0.726	1
CO2/Ar	CO2/Ar_R	0.1444	-0.04098	0.1361	-0.3474	0.04698	0.6146	-0.3318	-0.9903	-0.7198	-0.6405	-0.02743	-0.249	-0.05261	-0.107	-0.1021	-0.1173	0.3431	0.646	0.8979	1
H2/Ar	H2/Ar_R	0.1585	-0.05147	0.2113	-0.2984	-0.02413	0.4841	-0.3545	-0.7918	-0.5997	-0.4552	0.4864	-0.1903	-0.07898	0.01969	-0.1171	0.01236	0.3598	0.519	0.7038	0.806	1
[RH] (redox)*	RH_R	-0.06181	-0.1323	-0.0538	0.7989	0.1955	-0.1891	-0.02921	0.3211	0.3814	0.2719	0.5166	0.06854	-0.03567	0.1493	-0.00119	0.1452	0.01864	-0.4167	-0.325	-0.3176	-0.01951	1
Equilibrium °T (°C)**	TK6_R	-0.1123	0.2088	0.0772	-0.7857	-0.2654	0.05005	0.05568	-0.3051	-0.3906	-0.1141	-0.2688	0.07463	0.2523	0.3473	0.2242	0.3515	-0.05865	0.4248	0.3488	0.3013	0.1411	-0.8211	1
*Equation (1) from this article explained in Giggenbach (1987)
**Equation 6 from Chiodini et al. (2010)
