# Supplementary material for: Monitoring of gas and fluid transport from the hydrothermal reservoir to the Cerro Pabellón geothermal plant; international validation of analytical protocols
Source: Research Square preprint supplement (doi:10.21203/rs.3.rs-6606023/v1), 2025-10-15
Supplement: Supplementary file 5 [file ac2953eecaae4727ad017da2.xlsx]

## Sheet: Table1
Nmuestra	Pozo	Line	Type	Laboratory	Date	Separation pressure	Brine flux	Vapor flux	Vapor Fraction	Gas Steam ratio	[CO2]	[H2S]	[Ar]	[O2]	[N2]	[H2]	[He]	[CH4]	[CO]	CH4/CO2	CO/CO2	CO2/H2S	N2/O2	N2/Ar	CO2/Ar	H2/Ar	RH* (Log H2/H2O)	Temperature**
						(Bar)	t/h	t/h	(%)	(weight%)	(mol%)	(mol%)	(mol%)	(mol%)	(mol%)	(mol%)	[ppm]	[ppm]	[ppm]									(°C)
						Psep	Qsal	Qvap	Vap Fraction	GV	CO2_pct	H2S_pct	Ar_pct	O2_pct	N2_pct	H2_pct	He_ppm	CH4_ppm	CO_ppm	CH4/CO2	CO/CO2	CO2/H2S	N2/O2	N2/Ar	CO2/Ar	H2/Ar	RH	TK6
1	Línea C/CP-1	C	Line	CEGA	2019-08-06	5.1619	230.3	68.7935	0.230007		98.51	0.45	0.006	0.03	0.94	0.069	12	16.8	5.7	1.70541e-05	5.78621e-06	218.911	31.3333	156.667	16418.3	11.5	-3.68593	283.894
2	Línea F/CP-5	F	Line	CEGA	2019-08-06	5.14104	208.314	118.586	0.36276		97.79	0.61	0.013	0.032	1.46	0.089	13	14.2	6.9	1.45209e-05	7.05594e-06	160.311	45.625	112.308	7522.31	6.84615	-3.29528	244.834
3	Línea J/CP-6	J	Line	CEGA	2019-10-02	6.32443	264.73	74.1042	0.218703	0.54	96.87	0.33	0.006	0.003	2.7	0.094	23	26.1	25.9	2.69433e-05	2.67369e-05	293.545	900	450	16145	15.6667	-3.57988	373.346
4	Línea J/CP-6	J	Line	CEGA	2019-11-27	5.42	305	95.4	0.238262	0.517	97.36	1.18	0.011	0.003	1.41	0.043	20	15.7	4.2	1.61257e-05	4.31389e-06	82.5085	470	128.182	8850.91	3.90909	-3.87133	291.994
5	Línea F/CP-5	F	Line	CEGA	2019-11-28	5.33	159	98	0.381323	0.893	98.24	0.31	0.012	0.021	1.3	0.109	11	11.1	3.3	1.12989e-05	3.35912e-06	316.903	61.9048	108.333	8186.67	9.08333	-3.17272	196.698
6	Línea C/CP-1 + 1A	C	Line	CEGA	2019-12-20	5.78	65	74	0.532374	0.686	96.52	0.83	0.017	0.003	2.5	0.129	15	15.5	3	1.60588e-05	3.10816e-06	116.289	833.333	147.059	5677.65	7.58824	-2.8331	162.71
7	Línea C/CP-1 + 1A	C	Line	CEGA	2020-01-14	4.69128	218.435	74.7927	0.255067	0.628	96.45	0.98	0.021	0.291	2.23	0.027	14	16.5	2.9	1.71073e-05	3.00674e-06	98.4184	7.66323	106.19	4592.86	1.28571	-4.03411	292.848
8	Línea F/CP-5	F	Line	CEGA	2020-01-15	4.71492	86.1377	90.0918	0.511219	0.514	97.75	0.64	0.011	0.109	1.37	0.121	12	11.1	3.9	1.13555e-05	3.98977e-06	152.734	12.5688	124.545	8886.36	11	-2.89774	177.834
9	Línea J/CP-6	J	Line	CEGA	2020-01-15	4.92356	241.098	77.0614	0.24221	0.485	96.91	0.9	0.017	0.142	1.99	0.036	15	13.5	5.3	1.39305e-05	5.46899e-06	107.678	14.0141	117.059	5700.59	2.11765	-3.93905	317.329
10	Línea C/CP-1 + 1A	C	Line	CEGA	2020-12-16	5.35	297	72	0.195122	0.586	98.16	0.84	0.005	0.003	0.96	0.03	14	16.9	5.7	1.72168e-05	5.80685e-06	116.857	320	192	19632	6	-4.13831	354.451
11	Línea F/CP-5	F	Line	CEGA	2020-12-16	5.05	163	88	0.350598	0.824	98.36	0.73	0.004	0.007	0.81	0.082	11	11	4.2	1.11834e-05	4.27003e-06	134.74	115.714	202.5	24590	20.5	-3.35387	226.478
12	Línea J/CP-6 + 6A	J	Line	CEGA	2020-12-16	5.71	689	165	0.193208	0.547	97.28	0.86	0.01	0.069	1.45	0.333	21	16.5	3.9	1.69613e-05	4.00905e-06	113.116	21.0145	145	9728	33.3	-3.09832	196.935
13	Línea F/CP-5	F	Line	CEGA	2021-01-12	6.22	130	137	0.513109	0.747	98.02	0.73	0.006	0.007	1.16	0.08	15	13.2	3.2	1.34666e-05	3.26464e-06	134.274	165.714	193.333	16336.7	13.3333	-3.07416	186.056
14	Línea C/CP-1 + 1A	C	Line	CEGA	2021-01-13	6.26	256	44.5	0.148087	0.888	98.34	0.61	0.005	0.003	0.99	0.053	14	16.4	4.8	1.66768e-05	4.88103e-06	161.213	330	198	19668	10.6	-4.03562	324.735
15	Línea J/CP-6 + 6A	J	Line	CEGA	2021-01-13	6.5	415	115.528	0.21776	0.659	97.06	1.09	0.013	0.098	1.7	0.033	16	12.3	2.4	1.26726e-05	2.4727e-06	89.0459	17.3469	130.769	7466.15	2.53846	-4.03684	281.378
16	Línea C/CP-1 + 1A	C	Line	CEGA	2021-06-16	4.96	339.8	85.6	0.201222	1.195	98.3	0.63	0.005	0.003	1	0.059	14	15.9	4.6	1.6175e-05	4.67955e-06	156.032	333.333	200	19660	11.8	-3.8279	290.847
17	Línea F/CP-5	F	Line	CEGA	2021-06-16	4.67	210	108.2	0.340038	0.752	98.3	0.47	0.005	0.008	1.13	0.073	16	13.8	4.8	1.40387e-05	4.88301e-06	209.149	141.25	226	19660	14.6	-3.42462	241.218
18	Línea J/CP-6 + 6A	J	Line	CEGA	2021-06-16	5	572	120	0.17341	0.601	98.05	0.71	0.006	0.003	1.18	0.052	18	12.9	3.8	1.31566e-05	3.87557e-06	138.099	393.333	196.667	16341.7	8.66667	-3.96223	298.366
19	Línea F/CP-5	F	Line	CEGA	2021-08-10	4.86	165.109	96.6	0.369112	0.61	98.05	0.91	0.005	0.019	0.95	0.062	14	11.1	3.3	1.13208e-05	3.36563e-06	107.747	50	190	19610	12.4	-3.4404	224.616
20	Línea C/CP-1 + 1A	C	Line	CEGA	2021-08-11	4.74	359.4	89.315	0.199046	0.95	97.62	1.44	0.005	0.021	0.85	0.061	13	13.4	3	1.37267e-05	3.07314e-06	67.7917	40.4762	170	19524	12.2	-3.81932	265.044
21	Línea J/CP-6 + 6A	J	Line	CEGA	2021-08-11	4.7	582.998	91	0.135015	0.55	96.7641	1.88207	0.00817104	0	1.22099	0.121423	17.1397	12.1217	3.13678	1.25271e-05	3.24167e-06	51.4138	-	149.429	11842.3	14.8602	-3.72232	255.704
22	Línea C/CP-1 + 1A	C	Line	CEGA	2021-10-19	5.5	300	88	0.226804	0.69	98.38	0.56	0.005	0.003	0.98	0.066	14	13.7	4.2	1.39256e-05	4.26916e-06	175.679	326.667	196	19676	13.2	-3.71308	269.789
23	Línea F/CP-5 + 5A	F	Line	CEGA	2021-10-20	5.55	183	114	0.383838	0.565	98.33	0.79	0.004	0.003	0.81	0.066	12	10.1	2.8	1.02715e-05	2.84755e-06	124.468	270	202.5	24582.5	16.5	-3.38603	211.013
24	Línea J/CP-6 + 6A	J	Line	CEGA	2021-10-20	5.4	558	86.2	0.133809	0.76	91.97	0.99	0.053	0.92	5.67	0.389	18	14.1	7.9	1.53311e-05	8.58976e-06	92.899	6.16304	106.981	1735.28	7.33962	-3.22116	246.185
25	Línea C/CP-1 + 1A	C	Line	CEGA	2021-11-17	5.2	315	82	0.206549	0.815	97.78	1.07	0.007	0.012	1.08	0.048	15	15.2	11.4	1.55451e-05	1.16588e-05	91.3832	90	154.286	13968.6	6.85714	-3.90326	366.529
26	Línea F/CP-5 + 5A	F	Line	CEGA	2021-11-17	5.47	200.7	103.2	0.339585	0.692	97.6	0.82	0.01	0.099	1.25	0.216	12	12.4	17.5	1.27049e-05	1.79303e-05	119.024	12.6263	125	9760	21.6	-2.95441	252.602
27	Línea J/CP-6 + 6A	J	Line	CEGA	2021-11-17	5.28	482	83	0.146903	0.41	96.47	1.51	0.016	0.036	1.91	0.055	19	15.7	19.1	1.62745e-05	1.97989e-05	63.8874	53.0556	119.375	6029.38	3.4375	-4.02362	437.326
28	Línea F/CP-5 + 5A	F	Line	CEGA	2022-01-12	5.94	294.4	137.1	0.317729	0.717	97.93	0.65	0.006	0.003	1.36	0.048	12	18.2	0.5	1.85847e-05	5.10569e-07	150.662	453.333	226.667	16321.7	8	-3.65066	165.524
29	Línea J/CP-6 + 6A	J	Line	CEGA	2022-01-12	6.11	496.9	115.8	0.189	0.458	95.94	0.36	0.0011	0.003	3.56	0.15	20	12.8	0.9	1.33417e-05	9.38086e-07	266.5	1186.67	3236.36	87218.2	136.364	-3.45655	171.602
30	Línea C/CP-1 + 1A	C	Line	CEGA	2022-01-13	6.1	375	89	0.19181	0.804	97.54	0.47	0.004	0.003	1.68	0.291	15	16.9	6.3	1.73262e-05	6.45889e-06	207.532	560	420	24385	72.75	-3.16071	224.992
31	Línea F/CP-5 + 5A	F	Line	CEGA	2022-03-22	4.74	576	176.2	0.234246	0.513	86.28	1.24	0.0011	0.003	12.47	0.36	28	369.9	204.7	0.00042872	0.000237251	69.5806	4156.67	11336.4	78436.4	327.273	-2.95991	440.677
32	Línea C/CP-1 + 1A	C	Line	CEGA	2022-03-23	5	577.6	143	0.198446	1.071	97.1	1	0.013	0.058	1.74	0.085	15	19.2	7.1	1.97734e-05	7.31205e-06	97.1	30	133.846	7469.23	6.53846	-3.67687	296.967
33	Línea J/CP-6 + 6A	J	Line	CEGA	2022-03-23	5.61	690	138.4	0.167069	0.467	95.69	0.78	0.0011	0.003	3.41	0.1	19	36.6	23.3	3.82485e-05	2.43495e-05	122.679	1136.67	3100	86990.9	90.9091	-3.69768	388.015
34	Línea C/CP-1 + 1A	C	Line	CEGA	2022-06-02	5.4	588.3	120.6	0.170123	0.834	97.42	1.28	0.006	0.055	1.13	0.097	15	20.2	8.7	2.0735e-05	8.9304e-06	76.1094	20.5455	188.333	16236.7	16.1667	-3.70145	313.534
35	Línea F/CP-5 + 5A	F	Line	CEGA	2022-06-02	4.71	487	145.8	0.230405	0.546	98.21	0.76	0.005	0.028	0.95	0.048	13	15	3.7	1.52734e-05	3.76744e-06	129.224	33.9286	190	19642	9.6	-3.84255	279.822
36	Línea J/CP-6 + 6A	J	Line	CEGA	2022-06-02	4.8	553.2	142.2	0.204487	0.446	96.85	1.83	0.006	0.02	1.13	0.167	17	29.2	14	3.01497e-05	1.44553e-05	52.9235	56.5	188.333	16141.7	27.8333	-3.36731	295.012
37	Línea F/CP-5 + 5A	F	Line	CEGA	2022-08-09	4.2	230	104	0.311377	0.499	98.63	0.26	0.007	0.003	0.97	0.137	11	12	12.7	1.21667e-05	1.28764e-05	379.346	323.333	138.571	14090	19.5714	-3.20802	266.453
38	Línea J/CP-6 + 6A	J	Line	CEGA	2022-08-09	4.5	491	121	0.197712	0.451	96.55	0.34	0.017	0.003	3.04	0.052	19	19	21	1.96789e-05	2.17504e-05	283.971	1013.33	178.824	5679.41	3.05882	-3.89233	417.586
39	Línea C/CP-1 + 1A	C	Line	CEGA	2022-08-10	5.6	237	63	0.21	1.051	98.42	0.3	0.003	0.003	1.16	0.12	18	15.9	7.5	1.61553e-05	7.6204e-06	328.067	386.667	386.667	32806.7	40	-3.49627	274.391
40	Línea F/CP-5 + 5A	F	Line	CEGA	2022-10-09	4.2	230	104	0.311377	0.499	98.55	0.23	0.005	0.003	1.11	0.106	9	10.6	11.3	1.0756e-05	1.14663e-05	428.478	370	222	19710	21.2	-3.31942	274.47
41	Línea J/CP-6 + 6A	J	Line	CEGA	2022-10-09	4.5	491	121	0.197712	0.451	96.14	0.21	0.007	0.003	3.59	0.049	19	17.8	19.5	1.85147e-05	2.02829e-05	457.81	1196.67	512.857	13734.3	7	-3.91812	416.624
42	Línea C/CP-1 + 1A	C	Line	CEGA	2022-10-10	5.6	237	63	0.21	1.051	98.28	0.32	0.007	0.01	1.28	0.099	18	18.3	10.2	1.86203e-05	1.03785e-05	307.125	128	182.857	14040	14.1429	-3.57978	305.027
43	Línea C/CP-1 + 1A	C	Line	CEGA	2022-12-23	5.65	237	63	0.21	1.051	98.64	0.36	0.005	0.003	0.91	0.077	15	13	5	1.31792e-05	5.06894e-06	274	303.333	182	19728	15.4	-3.68891	276.476
44	Línea F/CP-5 + 5A	F	Line	CEGA	2022-12-23	6.2	220	135	0.380282	0.472	98.49	0.43	0.007	0.02	0.98	0.07	11	9.5	5.7	9.64565e-06	5.78739e-06	229.047	49	140	14070	10	-3.36699	243.126
45	Línea J/CP-6 + 6A	J	Line	CEGA	2022-12-23	6.4	nd	85	1	0.452	97.49	0.67	0.014	0.016	1.78	0.037	17	12.8	6.2	1.31296e-05	6.35963e-06	145.507	111.25	127.143	6963.57	2.64286	-	-
46	Línea F/CP-5 + 5A	F	Line	CEGA	2023-01-19	4.5	170	137	0.446254	0.582	98.53	0.16	0.012	0.003	1.18	0.117	10	10.3	4.1	1.04537e-05	4.16117e-06	615.812	393.333	98.3333	8210.83	9.75	-3.02556	191.441
47	Línea C/CP-1 + 1A	C	Line	CEGA	2023-01-20	5.65	220	66.6	0.23238	0.464	98.43	0.32	0.006	0.003	1.12	0.118	17	16.1	6.7	1.63568e-05	6.80687e-06	307.594	373.333	186.667	16405	19.6667	-3.44707	261.604
48	Línea J/CP-6 + 6A	J	Line	CEGA	2023-01-20	4.7	480	114	0.191919	0.429	97.11	1.41	0.01	0.003	1.39	0.068	20	15	4.7	1.54464e-05	4.83987e-06	68.8723	463.333	139	9711	6.8	-3.79181	287.828
49	Línea C/CP-1 + 1A	C	Line	CEGA	2023-04-14	5.65	190	62	0.246032	0.552	98.42	0.42	0.004	0.003	1.08	0.078	16	14.5	5.9	1.47328e-05	5.99472e-06	234.333	360	270	24605	19.5	-3.5943	273.569
50	Línea J/CP-6 + 6A	J	Line	CEGA	2023-04-14	4.54	520	91	0.148936	0.486	97.95	0.59	0.008	0.003	1.36	0.086	19	14	4.8	1.4293e-05	4.90046e-06	166.017	453.333	170	12243.8	10.75	-3.82247	292.92
51	Línea F/CP-5 + 5A	F	Line	CEGA	2023-04-15	4.39	165.5	140.7	0.459504	0.9	99.05	0.24	0.0011	0.003	0.59	0.125	10	10.3	8.2	1.03988e-05	8.27865e-06	412.708	196.667	536.364	90045.5	113.636	-2.97365	216.398
52	Pozo C/CP-6	CP6	Hole	CEGA	2023-09-07	18.2	nd	nd	nd	nd	49.3	0.56	0.38	10.006	39.35	0.398	13	13.3	84	2.69777e-05	0.000170385	88.0357	3.93264	103.553	129.737	1.04737	-	-
53	Pozo C/CP-6	CP6	Hole	CEGA	2023-09-07	18.2	nd	nd	nd	nd	60.8	0.62	0.295	7.494	30.41	0.368	14	16.1	81.3	2.64803e-05	0.000133717	98.0645	4.05791	103.085	206.102	1.24746	-	-
54	Pozo C/CP-6+6A	CP6	Hole	CEGA	2023-09-07	20.6	nd	nd	nd	nd	98.06	0.27	0.009	0.02	1.58	0.044	23	16.3	16.5	1.66225e-05	1.68264e-05	363.185	79	175.556	10895.6	4.88889	-	-
55	Pozo C/CP-5A	CP5A	Hole	CEGA	2023-09-26	4.24	200	97	0.673401	0.469	97.75	0.95	0.007	0.01	1.19	0.077	17	20	20.3	2.04604e-05	2.07673e-05	102.895	119	170	13964.3	11	-2.79921	241.603
56	Pozo C/CP-5	CP5	Hole	CEGA	2023-09-26	4.03	50	105	0.322581	0.702	96.01	0.78	0.022	0.416	2.62	0.151	13	12.2	10.5	1.2707e-05	1.09364e-05	123.09	6.29808	119.091	4364.09	6.86364	-3.14325	249.442
57	Pozo C/CP-5	CP5	Hole	CEGA	2023-09-26	4.03	50	105	0.322581	0.702	88.83	0.62	0.078	1.96	8.36	0.153	12	11.3	10	1.27209e-05	1.12575e-05	143.274	4.26531	107.179	1138.85	1.96154	-3.13755	250.276
58	Línea C/CP-2 + 2A	M	Line	CEGA	2023-09-28	4.52	490	130	0.790323	0.956	97.95	0.73	0.007	0.035	1.24	0.036	16	17.5	7.6	1.78663e-05	7.75906e-06	134.178	35.4286	177.143	13992.9	5.14286	-2.86745	202.492
59	Línea J/CP-6 + 6A	J	Line	CEGA	2023-09-28	5.2	nd	nd	nd	0.503	97.32	0.59	0.011	0.13	1.87	0.073	21	17.8	9.8	1.82902e-05	1.00699e-05	164.949	14.3846	170	8847.27	6.63636	-	-
60	Línea C/CP-1 + 1A	C	Line	CEGA	2023-09-28	4.94	246	43	0.851211	1.066	93.85	0.73	0.042	0.801	4.46	0.117	17	16.7	14.2	1.77944e-05	1.51305e-05	128.562	5.56804	106.19	2234.52	2.78571	-2.17437	165.14
61	Línea J contamin./CP-6 + 6A	J	Line	CEGA	2024-01-26	4.5	400	nd	nd	0.528	97.0282	0.772603	0.0118794	0.0828725	1.8103	0.260715	20.5	227.649	85.778	0.000234622	8.84052e-05	125.586	21.8444	152.39	8167.76	21.9468	-	-
62	Línea J contamin./CP-6 + 6A	J	Line	CEGA	2024-01-26	4.5	400	nd	nd	0.528	97.1987	0.603316	0.0115634	0.0787497	1.74813	0.31651	21	295.915	113.478	0.000304443	0.000116749	161.108	22.1986	151.178	8405.7	27.3716	-	-
63	Línea C/CP-1 + 1A	C	Line	CEGA	2024-01-27	4.38	143.7	nd	nd	1150	97.032	0.758875	0.0144743	0.149645	1.97672	0.0642601	18	14.3852	7.25785	1.48252e-05	7.47985e-06	127.863	13.2093	136.567	6703.74	4.43959	-	-
64	Línea C/CP-1 + 1A	C	Line	CEGA	2024-01-27	4.38	143.7	nd	nd	1150	97.2482	1.1641	0.00817176	0.0109684	1.49458	0.0692034	21	17.6955	8.85911	1.81962e-05	9.1098e-06	83.5394	136.262	182.896	11900.5	8.46861	-	-
65	Línea F/CP-5 + 5A	F	Line	CEGA	2024-01-27	3.57	nd	nd	nd	0.482	98.1598	0.776288	0.00516157	0.0138847	0.869193	0.172563	10.5	11.201	4.81865	1.1411e-05	4.90898e-06	126.448	62.6007	168.397	19017.4	33.4322	-	-
66	Línea F/CP-5 + 5A	F	Line	CEGA	2024-01-27	3.57	nd	nd	nd	0.482	98.1432	0.807646	0.00552203	0.0163287	0.897119	0.127051	10	10.9997	5.03138	1.12078e-05	5.12657e-06	121.518	54.9412	162.462	17773	23.0081	-	-
67	Línea C/CP-2 + 2A	M	Line	CEGA	2024-01-28	5.1	389.6	94.6	0.804626	1018	97.5936	0.458073	0.0114307	0.118833	1.75376	0.0604565	15.5	17.6761	5.32762	1.8112e-05	5.45899e-06	213.053	14.7581	153.425	8537.85	5.28896	-2.60383	164.009
68	Línea C/CP-2 + 2A	M	Line	CEGA	2024-01-28	5.1	389.6	94.6	0.804626	1018	98.3511	0.46349	0.00598004	0.0122324	1.11875	0.0449365	14	16.4699	4.23236	1.6746e-05	4.30331e-06	212.197	91.4579	187.081	16446.6	7.51441	-2.73267	166.189
69	Línea J/CP-6 + 6A	J	Line	CEGA	2024-04-06	6.3	580	35	0.943089	0.524	95.86	0.85	0.025	0.255	2.91	0.095	21	16.6	6.9	1.73169e-05	7.198e-06	112.776	11.4118	116.4	3834.4	3.8	-1.80291	112.931
70	Línea J/CP-6 + 6A	J	Line	CEGA	2024-04-06	6.3	580	35	0.943089	0.524	96.19	1.01	0.021	0.181	2.49	0.103	21	17.1	8.3	1.77773e-05	8.62876e-06	95.2376	13.7569	118.571	4580.48	4.90476	-1.7678	115.843
71	Línea F/CP-5 + 5A	F	Line	CEGA	2024-04-07	5.7	150	nd	nd	1.057	95.59	0.55	0.028	0.496	3.22	0.108	12	11.4	6.3	1.19259e-05	6.59065e-06	173.8	6.49194	115	3413.93	3.85714	-	-
72	Línea F/CP-5 + 5A	F	Line	CEGA	2024-04-07	5.7	150	nd	nd	1.057	95.75	0.56	0.027	0.411	3.02	0.233	17	18.2	13.2	1.90078e-05	1.37859e-05	170.982	7.34793	111.852	3546.3	8.62963	-	-
73	Línea C/CP-1 + 1A	C	Line	CEGA	2024-04-08	5.2	140.3	25	0.84876	0.983	97.1	0.97	0.013	0.089	1.77	0.065	16	13.7	4.7	1.41092e-05	4.84037e-06	100.103	19.8876	136.154	7469.23	5	-2.43801	146.238
74	Línea C/CP-2 + 2A	M	Line	CEGA	2024-04-09	6.3	490	130	0.790323	0.874	96.63	0.19	0.022	0.366	2.68	0.109	16	16.2	3.7	1.6765e-05	3.82904e-06	508.579	7.3224	121.818	4392.27	4.95455	-2.38632	134.572
75	Línea C/CP-2 + 2A	M	Line	CEGA	2024-04-09	6.3	490	130	0.790323	0.874	98.12	0.42	0.009	0.029	1.31	0.105	15	15.9	2.6	1.62046e-05	2.64982e-06	233.619	45.1724	145.556	10902.2	11.6667	-2.40254	124.226
76	Línea C/CP-1 + 1A	C	Line	CEGA	2024-06-10	5.02	135.7	56.7	0.705301	0.89	97.38	1.31	0.008	0.062	1.17	0.064	17	14	14	1.43767e-05	1.43767e-05	74.3359	18.871	146.25	12172.5	8	-2.81482	225.169
77	Línea J/CP-6 + 6A	J	Line	CEGA	2024-06-11	4.8	300	6.9	0.977517	0.486	95.18	1.51	0.025	0.423	2.8	0.053	20	13	13	1.36583e-05	1.36583e-05	63.0331	6.61939	112	3807.2	2.12	-1.63743	120.546
78	Línea J/CP-6 + 6A	J	Line	CEGA	2024-08-02	4.21	470	110	0.810345	0.622	93.42	1.34	0.042	0.696	4.39	0.102	21	15.6	7.7	1.66988e-05	8.24235e-06	69.7164	6.30747	104.524	2224.29	2.42857	-2.36067	158.621
79	Línea F/CP-5 + 5A	F	Line	CEGA	2024-08-03	4.563	243	nd	nd	0.782	97.45	0.63	0.012	0.087	1.63	0.186	15	16.2	6.8	1.66239e-05	6.97794e-06	154.683	18.7356	135.833	8120.83	15.5	-	-
80	Línea J/CP-6 + 6A	J	Line	CEGA	2024-08-08	4.21	470	110	0.810345	0.622	95.96	1.27	0.022	0.21	2.43	0.106	21	16.4	8.2	1.70905e-05	8.54523e-06	75.5591	11.5714	110.455	4361.82	4.81818	-2.344	158.538
81	Duplicate ID80	J	Line	INGVPalermo	2024-08-03	4.563	243	nd	nd	0.728	100.78	0.0328	nd	0.0464	0.99	0.0014	14	nd	10	-	9.9226e-06	3072.56	21.3362	-	-	-	-	-
82	Duplicate ID80	J	Line	INGVPalermo	2024-08-03	4.563	243	nd	nd	0.728	102	nd	nd	0.44	2.04	0.0014	12	6	nd	5.88235e-06	-	-	4.63636	-	-	-	-	-
83	Duplicate ID80	J	Line	INGVPalermo	2024-08-03	4.563	243	nd	nd	0.728	103.65	0.0639	nd	0.0014	0.95	0.0015	12	5	nd	4.82393e-06	-	1622.07	678.571	-	-	-	-	-
84	Duplicate ID79	F	Line	INGVPalermo	2024-08-02	4.21	470	110	0.189655	0.622	92.36	0.0025	nd	1.33	6	0.0912	17	nd	nd	-	-	36944	4.51128	-	-	-	-3.66978	-
85	Duplicate ID79	F	Line	INGVPalermo	2024-08-02	4.21	470	110	0.189655	0.622	71.48	0.0038	nd	6.85	25.95	0.0647	17.97	6.46	nd	9.03749e-06	-	18810.5	3.78832	-	-	-	-3.8383	-
86	Duplicate ID79	F	Line	INGVPalermo	2024-08-02	4.21	470	110	0.189655	0.622	96.72	nd	nd	0.0337	1.14	0.0017	16	16	nd	1.65426e-05	-	-	33.8279	-	-	-	-5.39103	-
87	Línea C/CP-1 + 1A	C	Line	CEGA	2024-10-08	6.4	76	222	0.255034	0.716	97.25	1.48	0.008	0.032	1.17	0.055	18	14	4	1.43959e-05	4.11311e-06	65.7095	36.5625	146.25	12156.2	6.875	-3.72517	269.254
88	Línea F/CP-5 + 5A	F	Line	CEGA	2024-12-08	6.68	287	nd	nd	0.418	92.85	2.02	0.041	0.766	4.24	0.082	16	10.6	3.3	1.14163e-05	3.55412e-06	45.9653	5.53525	103.415	2264.63	2	-	-
89	Línea F/CP-5 + 5A	F	Line	CEGA	2024-12-08	6.68	287	nd	nd	0.418	95.12	1.61	0.025	0.375	2.8	0.072	17	11.3	2.6	1.18797e-05	2.73339e-06	59.0807	7.46667	112	3804.8	2.88	-	-
90	Línea F/CP-5 + 5A	F	Line	CEGA	9.10-2024	6.44	600	nd	nd	0.474	96.76	1.46	0.012	0.053	1.58	0.129	17	13.1	4	1.35387e-05	4.13394e-06	66.274	29.8113	131.667	8063.33	10.75	-	-
*Equation (1) from this article explained in Giggenbach (1987)
**Equation 6 from Chiodini et al. (2010)
