# Supplementary material for: Monitoring of gas and fluid transport from the hydrothermal reservoir to the Cerro Pabellón geothermal plant; international validation of analytical protocols
Source: Research Square preprint supplement (doi:10.21203/rs.3.rs-6606023/v1), 2025-10-15
Supplement: Supplementary file 6 [file fd49ab860d3c7480495f767f.xlsx]

## Sheet: Table5
Variable (Original name)	Variable units	Variable*	PC1	PC2	PC3	PC4
[Li]	ppm	Li_LN	0.8837	0.1927	-0.0571	0.3731
[Na]	ppm	Na_LN	0.8551	-0.0256	-0.099	0.1764
[Al]	ppm	Al_LN	-0.5595	-0.4117	0.5363	0.3703
[Cl]	ppm	Cl_LN	0.8732	0.244	0.1497	-0.1281
[Ca]	ppm	Ca_LN	0.889	0.0582	0.2748	0.26
[Fe]	ppm	Fe_LN	-0.0611	-0.9211	0.219	-0.0627
[As]	ppm	As_LN	0.8584	-0.2672	0.1085	0.2776
[Sb]	ppm	Sb_LN	0.8406	-0.3504	-0.202	0.0231
[Cs]	ppm	Cs_LN	0.9042	0.218	-0.0477	0.318
[SO4]	ppm	SO4_LN	0.12	0.645	0.6964	-0.1457
pH	pH	pH_LN	0.879	-0.1969	-0.109	-0.2889
Temperature	(°C)	T_LN	-0.6887	-0.1823	0.4471	-0.0728
Conductivity	µS/cm	cond_LN	0.946	-0.0941	0.1588	-0.2252
Alcalinity	(%)	alc_LN	0.9471	-0.172	0.087	-0.1786
[HCO32-]	ppm	HCO3_LN	0.9471	-0.172	0.087	-0.1786
Total dissolved solids	ppm	TDS_LN	0.9237	0.0129	0.2148	-0.1829
		Proportion explained variables%	65.29	11.98	8.029	5.2
*Abbreviation used for PCA and UMAP figures
